# Supplementary material
Source: PubMed Central journal article supplement (PMC8316378)
Supplement: NIHMS1701139-supplement-tableS1-S2.pdf [file NIHMS1701139-supplement-tableS1-S2.pdf]

**Supplementary Table S1: Sequences of RT-qPCR primers.**

| <b>Gene</b> | <b>Forward Primer</b>          | <b>Reverse Primer</b>          |
|-------------|--------------------------------|--------------------------------|
| <i>ACT2</i> | 5'-CCAAGCTGTTCTCTCCTTGTACGC-3' | 5'-TCACCAGAATCCAGCACAATACC-3'  |
| <i>FPN3</i> | 5'-GTGGGTTCTTTGCCAACCATGAC-3'  | 5'-TTAGGACGGTCCAGAACTCCAG-3'   |
| <i>FPN1</i> | 5'-TTGCAAGATGGAGTGCCAGAAC-3'   | 5'-AATGGCAGCGAGAAGCAGAGAG-3'   |
| <i>FPN2</i> | 5'-TGCTGCTTCTAGGCTTGGTTTG-3'   | 5'-TCCTGCATTTGCTGGATTACCG-3'   |
| <i>MIT1</i> | 5'-GCAGTTGCAATGTCAGGGTGTG-3'   | 5'-TCACTATTGTACGGAACACATCGC-3' |
| <i>MIT2</i> | 5'-ATTGGCAGCTGCTGTGACTACG-3'   | 5'-TCACATCCACACACACCCTGAC-3'   |
| <i>YSL4</i> | 5'-TCGTTCCACTTCGCAAGGTGATG-3'  | 5'-ACATTGCTGTAGCGGTTCCACTG-3'  |
| <i>YSL6</i> | 5'-TCGTTCCGTTACGCAAGGTG-3'     | 5'-AGCTCCAGTGTTGGTGTGGAAG-3'   |

## Supplementary Table S2: NanoString Custom CodeSet

| Gene          | Target Sequence                                                                                        |
|---------------|--------------------------------------------------------------------------------------------------------|
| <i>ACT2</i>   | TGATGAGGCAGGTCCAGGAATCGTTCACAGAAAATGTTTCTAAGCTCTCAAGATCAAAGGCTTAAAAAGCTGGGGTTTTATGAATGGGATCAAAGTTTCT   |
| <i>FER1</i>   | CAAATCTCAGGCGGCTCAACACTATCCTCTTCTACATTTTCCAACGATGGCCTCAAACGCACTCTCGTCTTTCACCGCCGCTAATCCCGCTCTGTCTCCT   |
| <i>FER3</i>   | GTGTGGAAGAACGAGAGCACGCTGAGCTGTTGATGGAGTATCAGAACAAACGTGGTGGGAGGGTCAAGTTACAGCCCATGGTGTTCCTCAGTCTGAGTT    |
| <i>FER4</i>   | TAAAAGCTCAACCACCGACGCGCTAAGCGGGGTTGTCTTCGAGCCGTTTAAAGGAAGTAAAAAAGGAGCTCGATCTCGTCCCTACCAGCTCTCATCTCTCA  |
| <i>FRO2</i>   | AAGCTTTGGTTATGGTGTGCGGAGGAAGCGGGATAACTCCGTTTATCTCTGTTATTCGTGATTTGATCGCCACAAGCCAAAAGGAAACATGCAAAATCCC   |
| <i>FRO3</i>   | CCATACCTTTGTCACCATCACTCCTCAATCACTTCCAACCGACGGAGATAACTTATGGCAAGCAAGGCTGGATTCAATAGCAGTAAGGTTAGGTCTAACA   |
| <i>FRO7</i>   | CTGGATCACTCGGTGATCAAATCCTCACAAACTGGAGAGCAATCTCCTCCAACACTCTCTTTGGCCTCACAGGAAGCATGTTCTTAATTTTCAGTGGTCC   |
| <i>FRO8</i>   | TCATGCCGGTGATCGTCACTTCTACTGGGTCTCCAGGCATGTTTCTCTTTGGACTCGACAAGATACTTCGGATTGTTCAATCACGATCTGAAAGCTGC     |
| <i>NRAMP4</i> | ACGGTGTGTTGCCAAGTCGTTTTACGGGACAGAGATAGCGGACACCATCGGTCTTGCAAATGCTGGACAGTACTTACAGGACAAAATACGGGGGTGGGTTTT |
| <i>UBC</i>    | GCGTGATGTTGTTGAGCAAAGCTGGACTGCTGACTAGTAGTAGTTTGTGTAAGCGTTGTAGCTCTCTCTACTTTCTCTCAATCACGATTCAGCAACAGC    |
